# Supplementary material for: Ultrasonic-Assisted Extraction of Xanthorrhizol from Curcuma xanthorrhiza Roxb. Rhizomes by Natural Deep Eutectic Solvents: Optimization, Antioxidant Activity, and Toxicity Profiles
Source: MDPI journal article supplement (doi:10.3390/molecules29092093), 2024-05-01
Supplement: s1 [file s1]

## Supplementary Material

### Green extraction of xanthorrhizol from rhizomes of *Curcuma xanthorrhiza* Roxb. by natural deep eutectic solvent combined with ultrasonic-assisted extraction

Adelina Simamora<sup>1,2,3</sup>, Kris Herawan Timotius<sup>2</sup>, Heri Setiawan<sup>3,4</sup>, Febrina Amelia Saputri<sup>5</sup>, Chinthia Rahadi Putri<sup>6</sup>, Dewi Aryani<sup>6</sup>, Ratih Asmana Ningrum<sup>3,7</sup>, Abdul Mun'im<sup>3,8\*</sup>

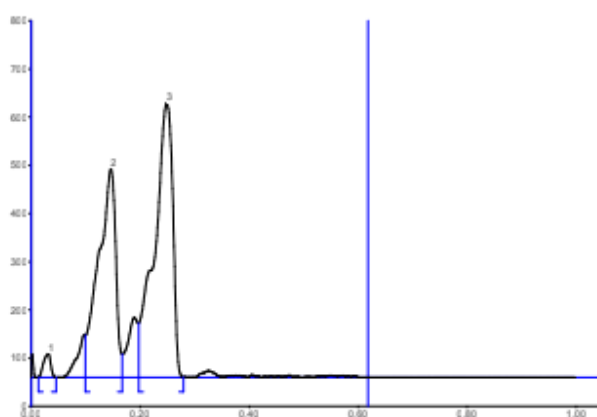

Supplementary Figure S1 A Representative of TLC-densitometry chromatogram of *C. xanthorrhiza* extracted by GluLA.

Supplementary Table S1 Independent variables and levels determined on the experimental design.

| Variables                    | Code           | Range and level (xi) |      |      |
|------------------------------|----------------|----------------------|------|------|
|                              |                | -1                   | 0    | 1    |
| Water content (%)            | X <sub>1</sub> | 10                   | 20   | 30   |
| Solid-to-liquid ratio (g/mL) | X <sub>2</sub> | 1/5                  | 1/10 | 1/15 |
| Extraction time (mins)       | X <sub>3</sub> | 10                   | 20   | 30   |

Supplementary Table S2 Analysis of Variance (ANOVA), factors, and their interaction factors for curcuminoids prediction model.

| Source                                | Sum of Squares | df | Mean Square | F-value | p-value  |                 |
|---------------------------------------|----------------|----|-------------|---------|----------|-----------------|
| <b>Model</b>                          | 24.85          | 9  | 2.76        | 1153.81 | < 0.0001 | **              |
| X <sub>1</sub> - Water content        | 0.1178         | 1  | 0.1178      | 49.23   | 0.0002   | **              |
| X <sub>2</sub> -Solid-to-liquid ratio | 23.16          | 1  | 23.16       | 9678.91 | < 0.0001 | **              |
| X <sub>3</sub> - Extraction time      | 0.1050         | 1  | 0.1050      | 43.89   | 0.0003   | **              |
| <b>Interactions</b>                   |                |    |             |         |          |                 |
| X <sub>1</sub> X <sub>2</sub>         | 0.8212         | 1  | 0.8212      | 343.12  | < 0.0001 | **              |
| X <sub>1</sub> X <sub>3</sub>         | 0.0233         | 1  | 0.0233      | 9.75    | 0.0168   |                 |
| X <sub>2</sub> X <sub>3</sub>         | 0.5848         | 1  | 0.5848      | 244.37  | < 0.0001 | **              |
| X <sub>1</sub> <sup>2</sup>           | 0.0061         | 1  | 0.0061      | 2.54    | 0.1548   |                 |
| X <sub>2</sub> <sup>2</sup>           | 5.084E-06      | 1  | 5.084E-06   | 0.0021  | 0.9645   | **              |
| X <sub>3</sub> <sup>2</sup>           | 0.0282         | 1  | 0.0282      | 11.78   | 0.0110   | **              |
| Residual                              | 0.0168         | 7  | 0.0024      |         |          |                 |
| Lack of Fit                           | 0.0096         | 3  | 0.0032      | 1.77    | 0.2914   | not significant |
| Pure Error                            | 0.0072         | 4  | 0.0018      |         |          |                 |
| Cor Total                             | 24.87          | 16 |             |         |          |                 |
| Std. Dev.                             | 0.0489         |    |             |         |          |                 |
| R <sup>2</sup>                        | 0.9993         |    |             |         |          |                 |
| Adjusted R <sup>2</sup>               | 0.9985         |    |             |         |          |                 |
| Predicted R <sup>2</sup>              | 0.9934         |    |             |         |          |                 |
| Adeq Precision                        | 114.8548       |    |             |         |          |                 |
| Mean                                  | 4.59           |    |             |         |          |                 |
| C.V %                                 | 1.07           |    |             |         |          |                 |

Level of significance: \*  $p < 0.01$ , \*\*  $p < 0.001$

Supplementary Table S3 The composition of the studied NADES and their abbreviations.

| Component 1 | Component 2 | Mole ratio | NADES abbreviation | Appearance                              |
|-------------|-------------|------------|--------------------|-----------------------------------------|
| Glucose     | lactic acid | 1:3        | GluLA              | Slightly viscous, pale yellowish liquid |
| Glucose     | malic acid  | 1:3        | GluMA              | Moderately viscous, transparent         |
| Glucose     | citric acid | 1:3        | GluCA              | Highly viscous, transparent             |

\*Following the formation of NADES, each NADES was added with water (20%, v/v).
